# Supplementary material for: The EULAR points to consider for use of antirheumatic drugs before pregnancy, and during pregnancy and lactation
Source: HighWire-hosted journal article supplement (doi:10.1136/annrheumdis-2015-208840), 2016-02-18

Supplementary Figure S1.

Systematic literature search for anti-rheumatic drugs in pregnancy (2008 – 2015)  
and lactation (1970 – 2015). **Biologic** and **non-biologic** agents

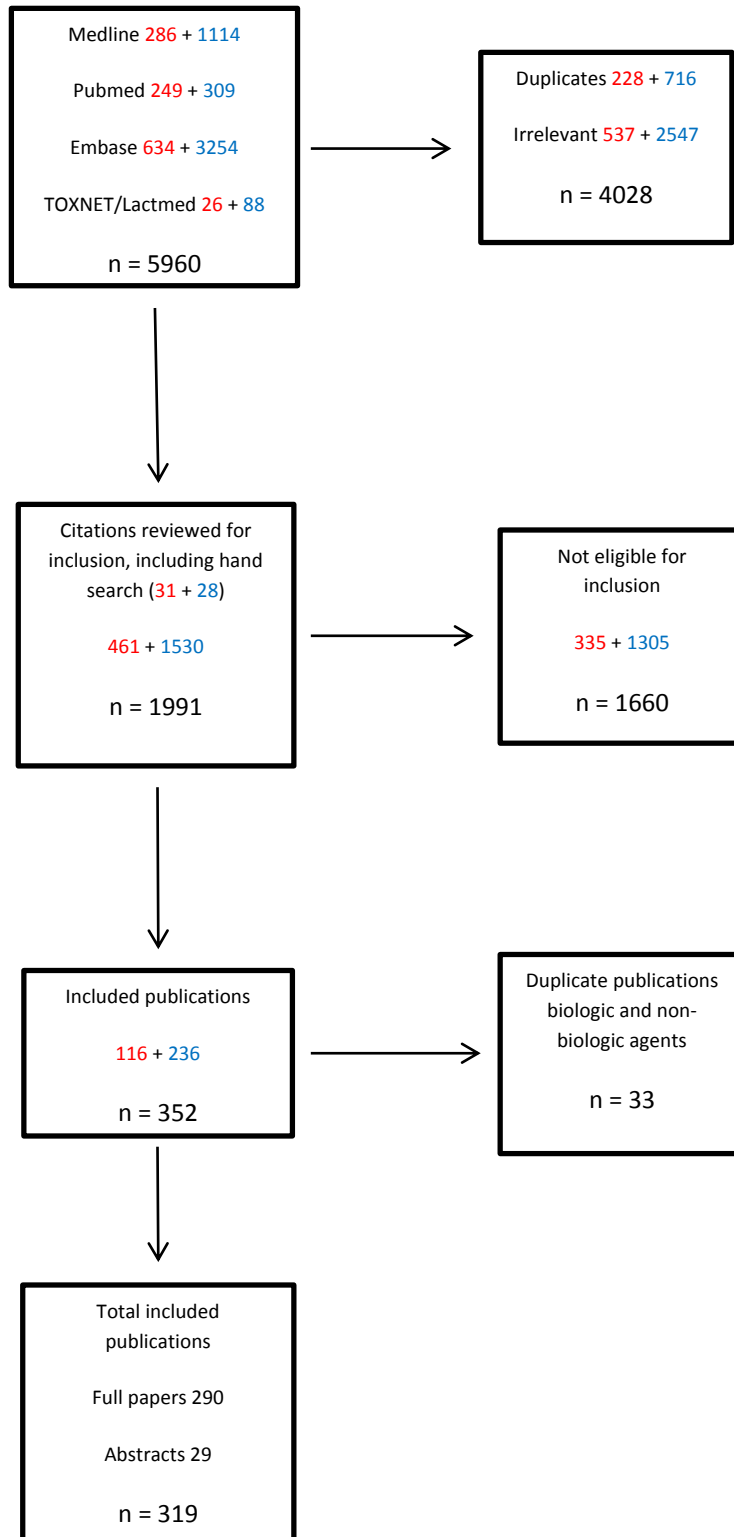

Supplement: annrheumdis-2015-208840supp_figure.pdf [file annrheumdis-2015-208840supp_figure.pdf]
