# Supplementary material for: The EULAR points to consider for use of antirheumatic drugs before pregnancy, and during pregnancy and lactation
Source: HighWire-hosted journal article supplement (doi:10.1136/annrheumdis-2015-208840), 2016-02-18
Supplement: annrheumdis-2015-208840supp_tableS2.pdf [file annrheumdis-2015-208840supp_tableS2.pdf]

**Supplementary Table S2. Expert opinion on use of antirheumatic drugs during pregnancy and breastfeeding**

|                           |                                                                                               |
|---------------------------|-----------------------------------------------------------------------------------------------|
| As an expert in the field |                                                                                               |
| ●                         | I would recommend the drug in the same way as if the patient was not pregnant                 |
| ●                         | I would only recommend the drug if I feared at least moderate disease activity in its absence |
| ●                         | I would only recommend the drug if I feared at least severe disease activity in its absence   |
| ●                         | I would never recommend the drug in pregnancy                                                 |
| As an expert in the field |                                                                                               |
| ●                         | I would recommend the drug in the same way as if the patient did not breastfeed               |
| ●                         | I would only recommend the drug if I feared at least moderate disease activity in its absence |
| ●                         | I would only recommend the drug if I feared at least severe disease activity in its absence   |
| ●                         | I would never recommend the drug while a woman was breastfeeding                              |
