# Supplementary material for: The EULAR points to consider for use of antirheumatic drugs before pregnancy, and during pregnancy and lactation
Source: HighWire-hosted journal article supplement (doi:10.1136/annrheumdis-2015-208840), 2016-02-18
Supplement: annrheumdis-2015-208840supp_tableS3.pdf [file annrheumdis-2015-208840supp_tableS3.pdf]

**Supplementary Table S3. GRADE – rating the quality of evidence (8)**

|                                    |                                                                                                                                                                                        |
|------------------------------------|----------------------------------------------------------------------------------------------------------------------------------------------------------------------------------------|
| High quality of evidence (++++)    | We are very confident that the true effect lies close to that of the estimate of the effect                                                                                            |
| Moderate quality of evidence (+++) | We are moderately confident in the effect estimate: The true effect is likely to be close to the estimate of the effect, but there is a possibility that it is substantially different |
| Low quality of evidence (++)       | Our confidence in the effect estimate is limited: The true effect may be substantially different from the estimate of the effect                                                       |
| Very low quality of evidence (+)   | We have very little confidence in the effect estimate: The true effect is likely to be substantially different from the estimate of effect                                             |
